# Supplementary material for: A clickable glutathione approach for identification of protein glutathionylation in response to glucose metabolism
Source: Royal Society of Chemistry journal article supplement (doi:10.1039/c6mb00175k), 2016-05-10
Supplement: c6mb00175k1.pdf [file c6mb00175k1.pdf]

## Supplementary Information

### Clickable Glutathione Approach for Identification of Protein Glutathionylation in Response to Glucose Metabolism

Kusal T. G. Samarasinghe,<sup>a</sup> Dhanushka N. P. Munkanatta Godage,<sup>a</sup> Yani Zhou,<sup>b</sup> Fidelis T. Ndombera,<sup>a</sup> Eranthie Weerapana,<sup>b</sup> Young-Hoon Ahn,<sup>a\*</sup>

<sup>a</sup>Department of Chemistry, Wayne State University, Detroit, Michigan 48202, United States

<sup>b</sup>Department of Chemistry, Boston College, Chestnut Hill, Massachusetts 02467, United States

1. Scheme for synthesis of glutathione derivatives for kinetic assays
2. Additional Figures (Figure S1-S9) and Table S1
3. Experimental procedure
  - 3.1. Material
  - 3.2. Synthesis of glutathione derivatives
  - 3.3. Purification of GSTO and GSTP
  - 3.4. Enzyme assays of GSTO, GSTP, and GR
  - 3.5. ROS and viability assays
  - 3.6. Cloning, expression, and enzyme assay of PP2C $\alpha$

## 1. Scheme for synthesis of glutathione derivatives for kinetic assays

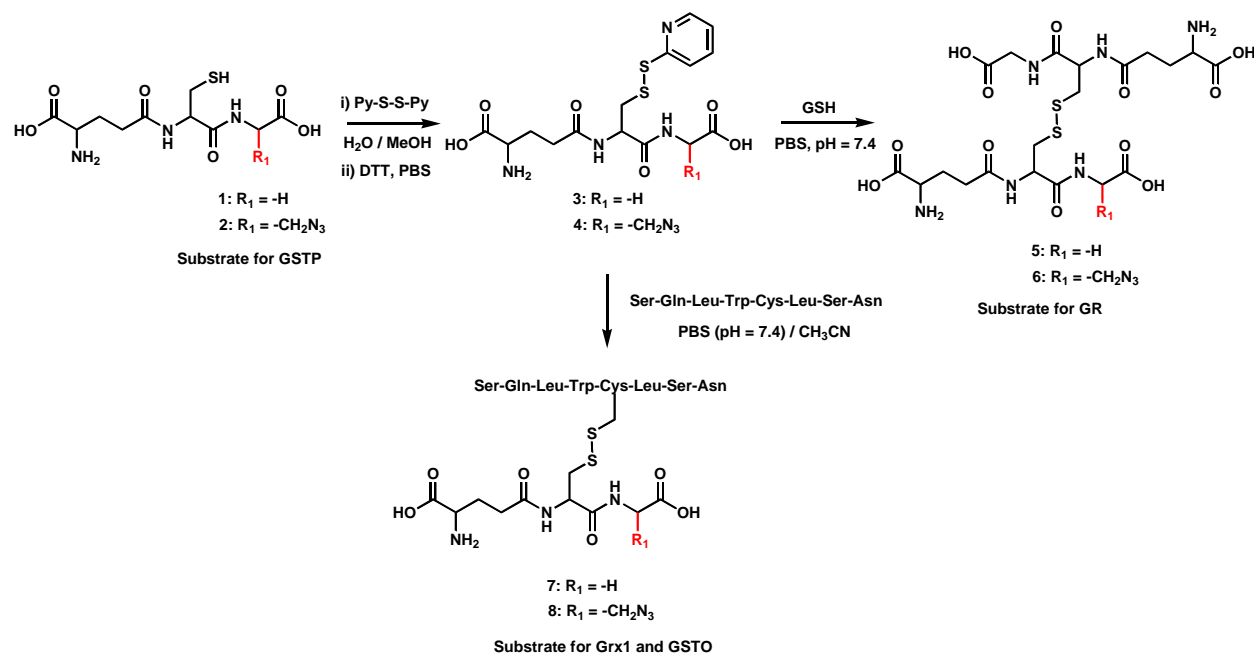

**Scheme S1.** Synthesis of glutathione derivatives for kinetic assays with GSTP, GSTO, and GR.

## 2. Additional Figures (Figure S1-S9) and Table S1

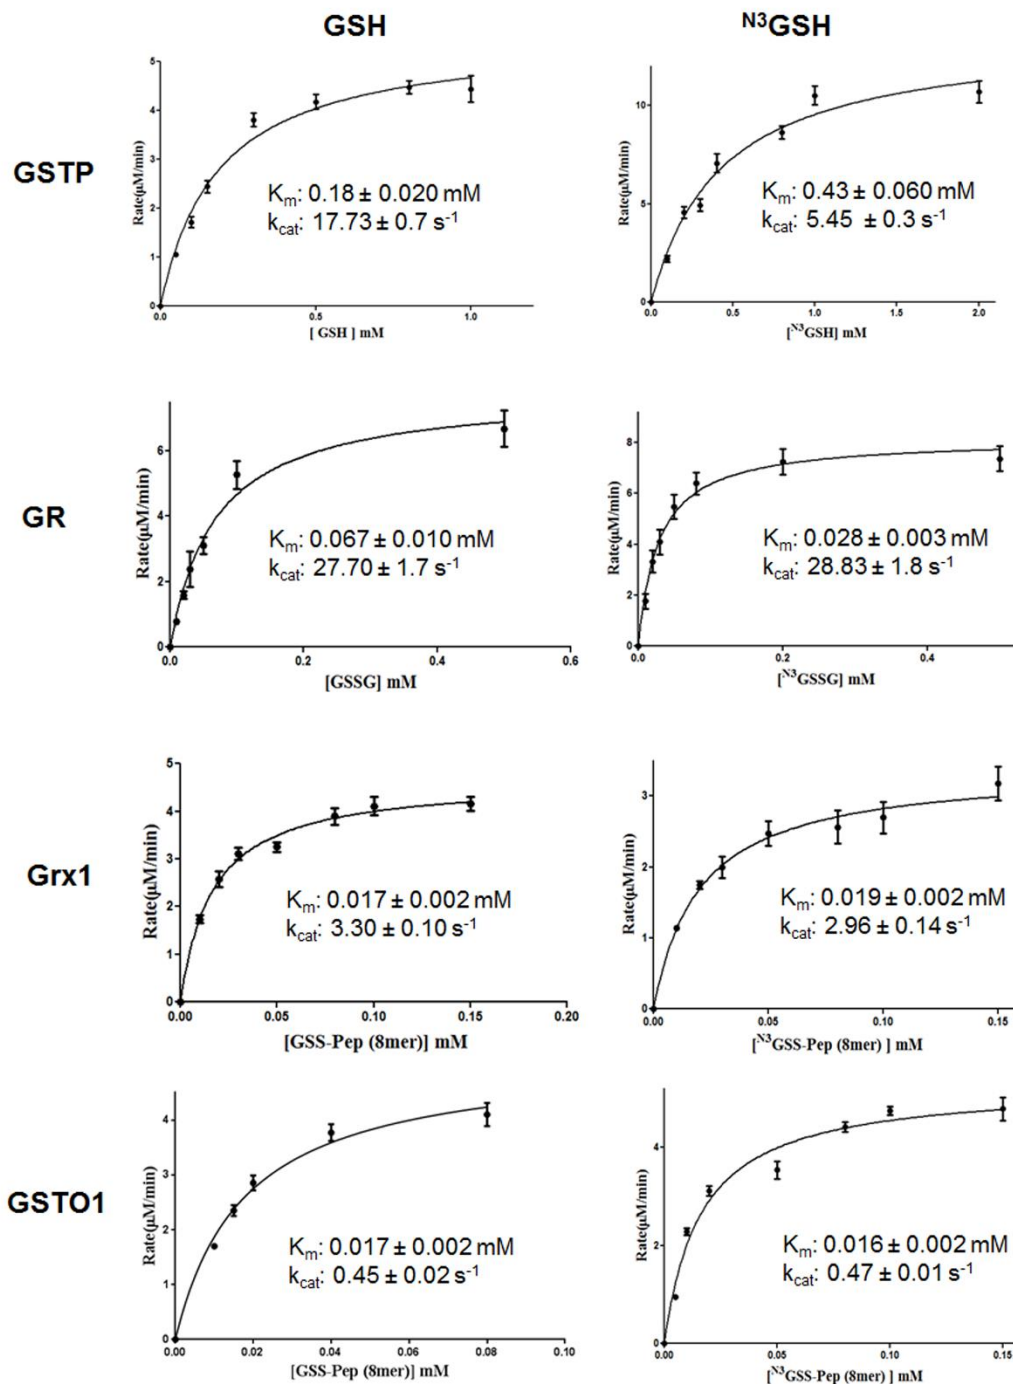

**Figure S1. Kinetic analysis of glutathione- and azido-glutathione-containing substrates with GSTP1, Grx1, GR, and GSTO1.** To calculate  $k_{cat}$  and  $K_m$  values, initial reaction rates were plotted with a range of substrate concentrations by using Graphpad Prism.

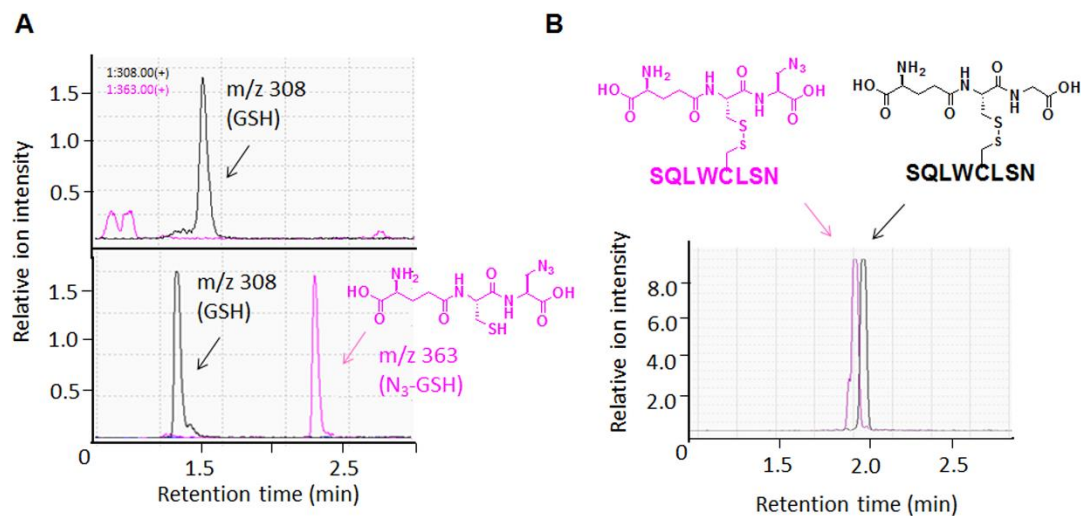

**Figure S2. Evaluation of azido-glutathione ( $N_3$ GSH) biosynthesis and in vitro glutathionylation.** (A) HEK293 cells stably expressing GS M4 was incubated with (bottom) or without (top) azido-Ala for 20 h. Cell lysates prepared was injected for LC-MS analysis,<sup>3</sup> detecting the extracted ion mass of endogenous glutathione (black) and azido-glutathione (pink). (B) LC-MS analysis of a model peptide (Pep: SQLWCLSN) incubated with  $H_2O_2$  (1 mM) in vitro in the presence of an 1:1 mixture of endogenous glutathione (GSH, black) and azido-glutathione ( $N_3$ GSH, pink), showing the similar level of glutathionylated peptide by both glutathione.

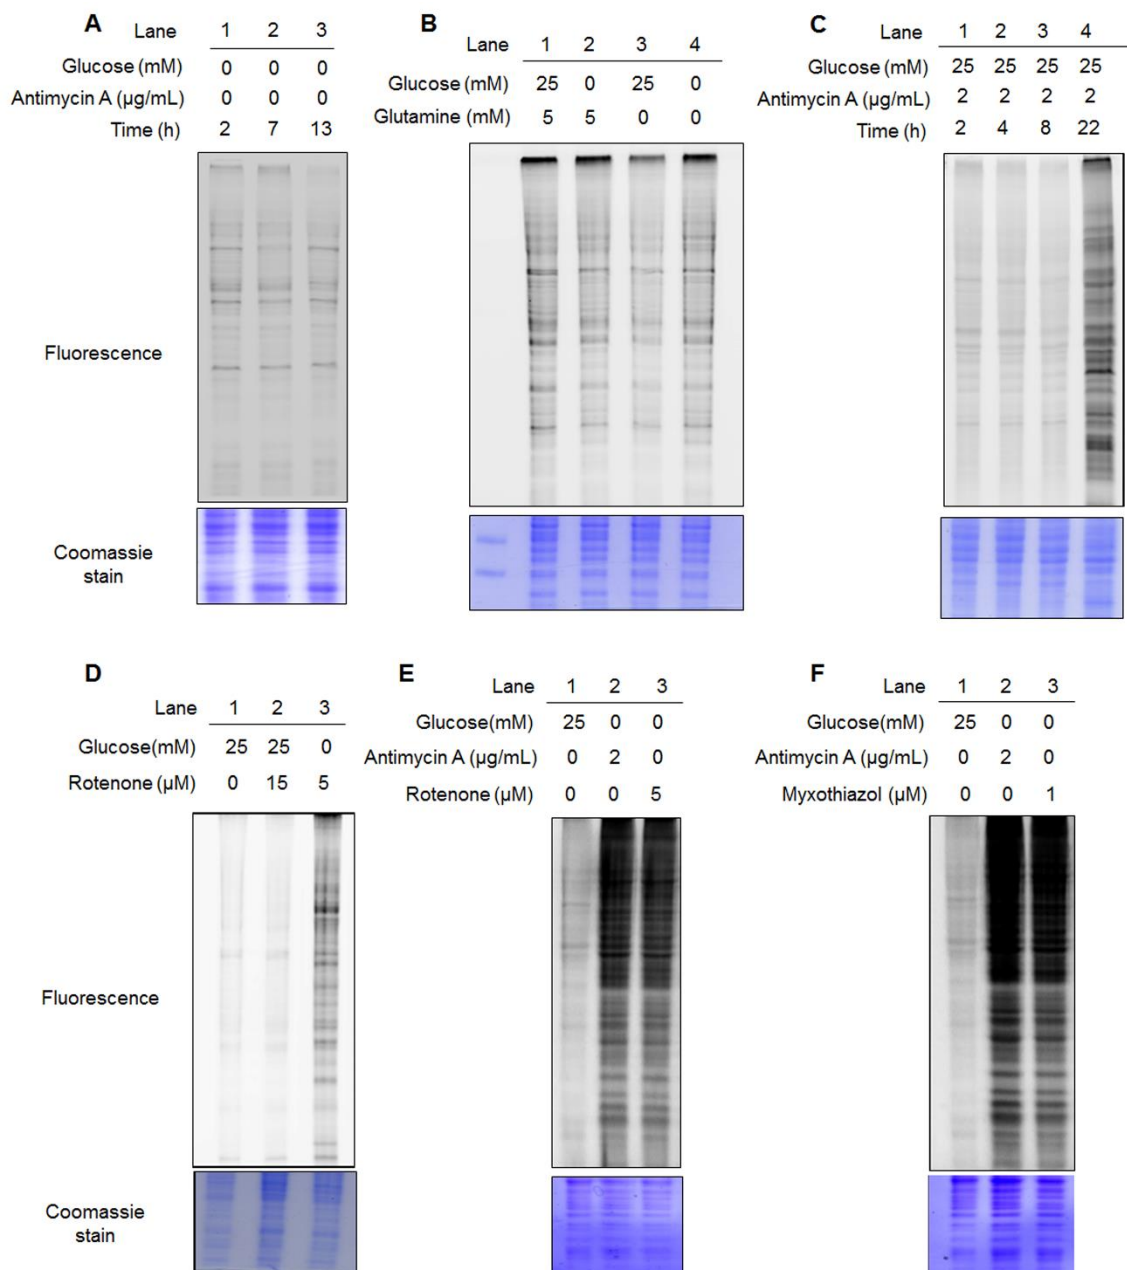

**Figure S3. Induction of glutathionylation by glucose starvation together with electron transport chain blockers.** After incubation of azido-Ala to HEK293/GS M4 cells for 20 h, cells were subjected to the following stimulus. (A) Cells were incubated in glucose-free medium. (B) Cells were incubated in a combination of glucose starvation and glutamine depletion for 2 h. (C) Cells were incubated with antimycin A alone in indicated conditions. (D) Cells were incubated in glucose starvation with rotenone for 2 h. (E) Glutathionylation in glucose starvation upon treatment of antimycin A or rotenone for 2 h. (F) Glutathionylation in glucose starvation upon treatment of antimycin A or myxothiazol for 2 h. After stimulus, cell lysates were subjected to click reaction with rhodamine-alkyne, and analyzed for fluorescence and Coomassie stain.

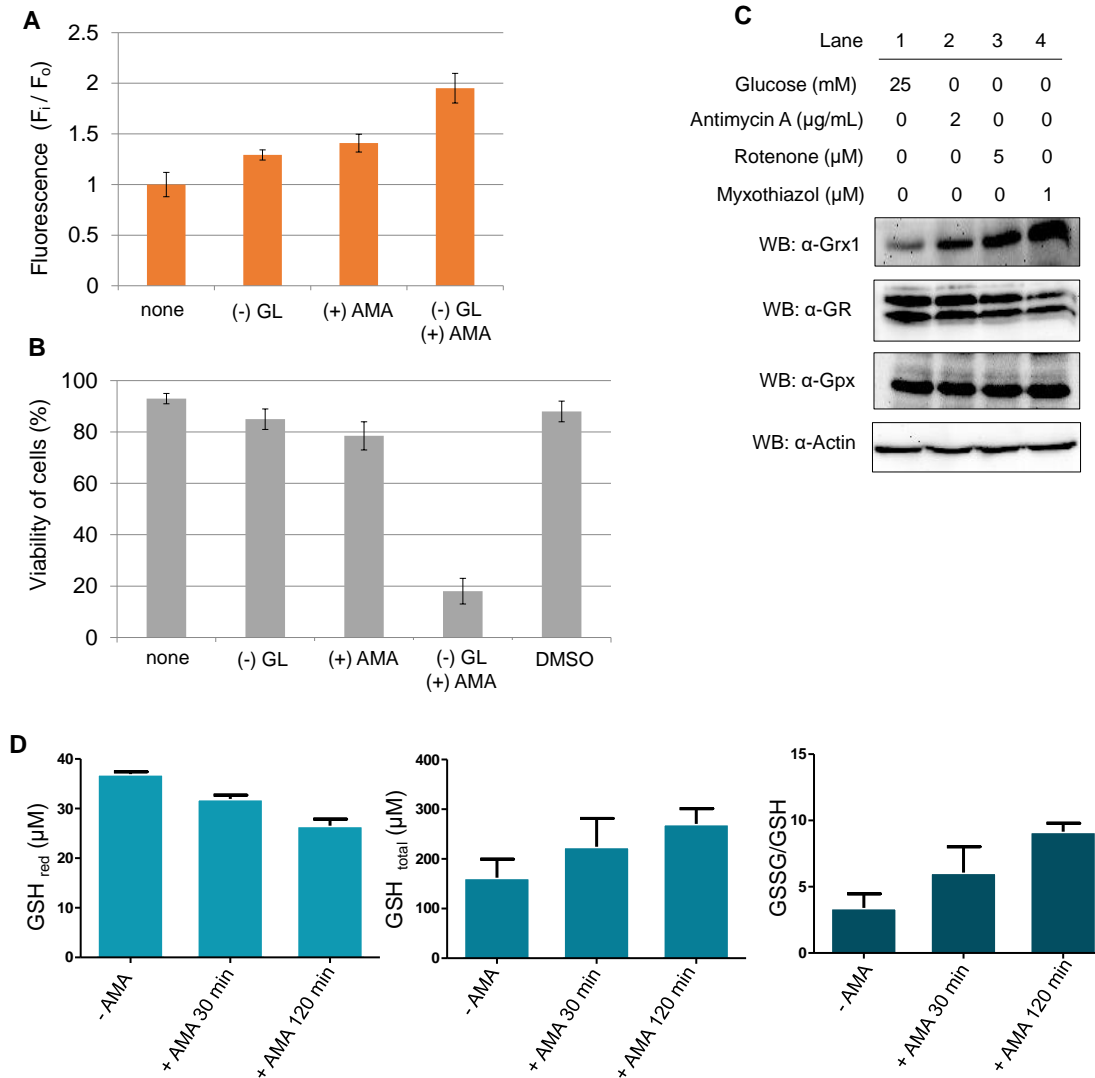

**Figure S4. Redox changes and viability of cells under glucose starvation with treatment of antimycin A.** (A) ROS induction assays: HEK293 cells were subjected to indicated conditions for 2-h, and cells were tested for ROS increases by 2',7'-dichlorodihydrofluorescein diacetate (DCF-DA) assay: none (25 mM glucose), (-) GL (0 mM glucose), (+) AMA (2  $\mu$ g/mL antimycin A), and (-) GL (+) AMA (0 mM glucose, 2  $\mu$ g/mL antimycin A). (B) Viability assays: HEK293 cells were subjected to indicated conditions for 24-h: none (25 mM glucose), (-) GL (0 mM glucose), (+) AMA (1  $\mu$ g/mL antimycin A), and (-) GL (+) AMA (0 mM glucose, 1  $\mu$ g/mL antimycin A). Cells were then tested for viability by Trypan blue assay. (C) Levels of redox enzymes: after HEK293 cells were subjected to indicated conditions for 2 h, individual antibodies were used for Western blotting. (D) The level of cellular thiols: after HEK293 cells were subjected to indicated conditions for 2-h, thiol concentrations in cell lysates free from proteins was measured by bromobimane assay in the presence and absence of TCEP, which were used to determine the total, the reduced form, and oxidized form of thiols (glutathione), respectively, in cell lysates.

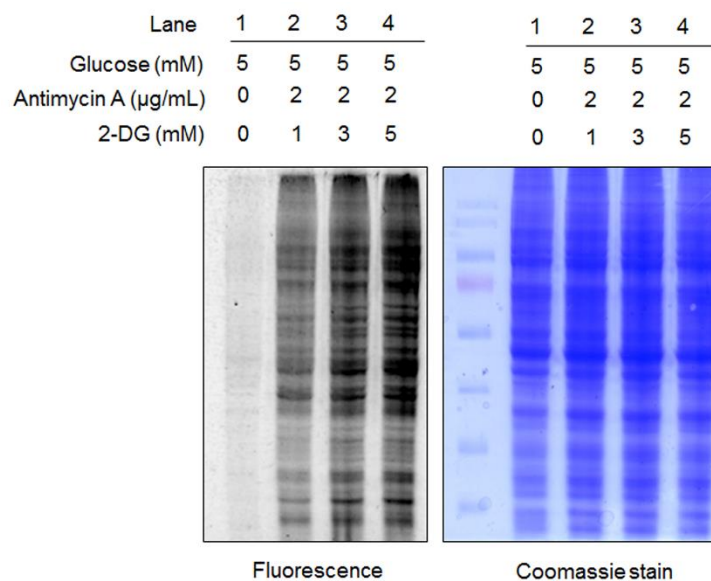

**Figure S5. Induction of glutathionylation by treatment of 2-deoxyglucose (2-DG) with electron transport chain blockers.** After incubation of azido-Ala to HEK293/GS M4 cells for 20 h, cells were serum-starved for 4-h. Cells were then incubated in glucose (5 mM) and antimycin A (2  $\mu\text{g/mL}$ ) with an increasing concentration of 2-DG for 2 h. After stimulus, cell lysates were subjected to click reaction with rhodamine-alkyne, and analyzed for fluorescence and Coomassie stain.

| A ratio of spectral<br>count in positive<br>vs. negative |       |      | # of<br>protein |
|----------------------------------------------------------|-------|------|-----------------|
| 10 ≤                                                     | ratio |      | 1291            |
| 5 ≤                                                      | ratio | < 10 | 28              |
| 2 ≤                                                      | ratio | < 5  | 64              |
| 0 ≤                                                      | ratio | < 2  | 145             |

**Figure S6. Analysis of proteomic data of glutathionylated proteins.** Identified proteins in glucose starvation with antimycin A for 2-h (positive) or in the presence of glucose without antimycin A (negative) were compared for the ratio of spectral counts in the positive versus negative sample. All spectral counts are the average of at least triplicate experiments of identical conditions.



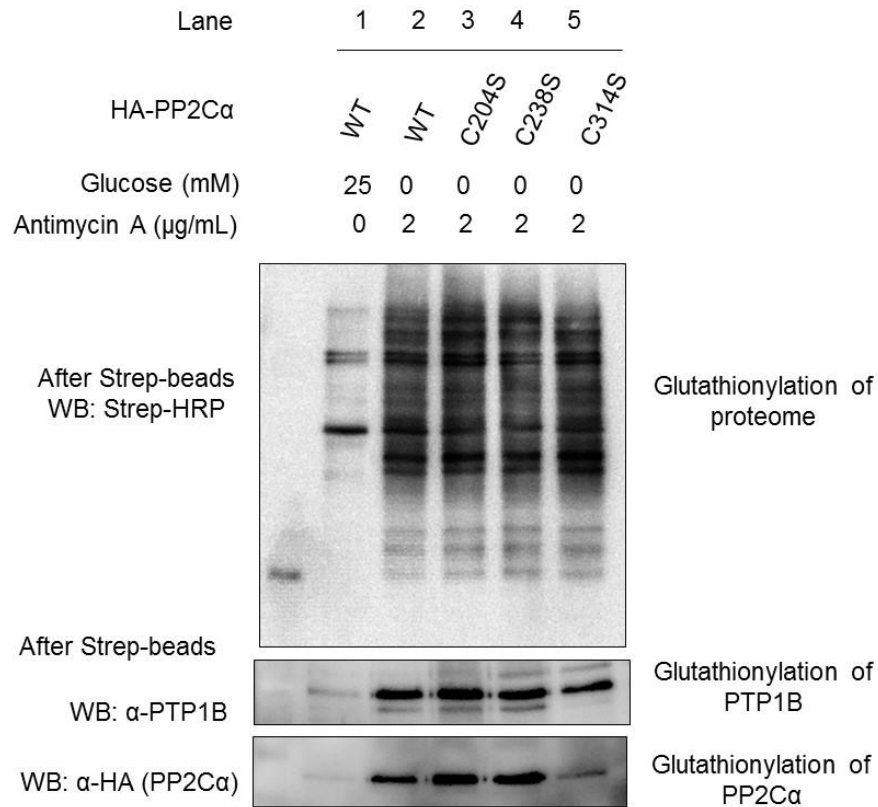

**Figure S7. Identification of global glutathionylation and PP2Cα glutathionylation in glucose starvation with antimycin A.** After incubation of azido-Ala in HEK293/GS M4 cells transfected with PP2Cα WT and mutants, cells were incubated in glucose starvation with antimycin A for 2-h. Cell lysates were subjected to click reaction with biotin-alkyne, and incubated with streptavidin-agarose. The enriched proteins were probed for global glutathionylation by streptavidin-HRP, or for individual proteins, PP2Cα and PTP1B. In PP2Cα C314S transfected cells, PP2Cα glutathionylation is significantly decreased while PTP1B glutathionylation did not change.

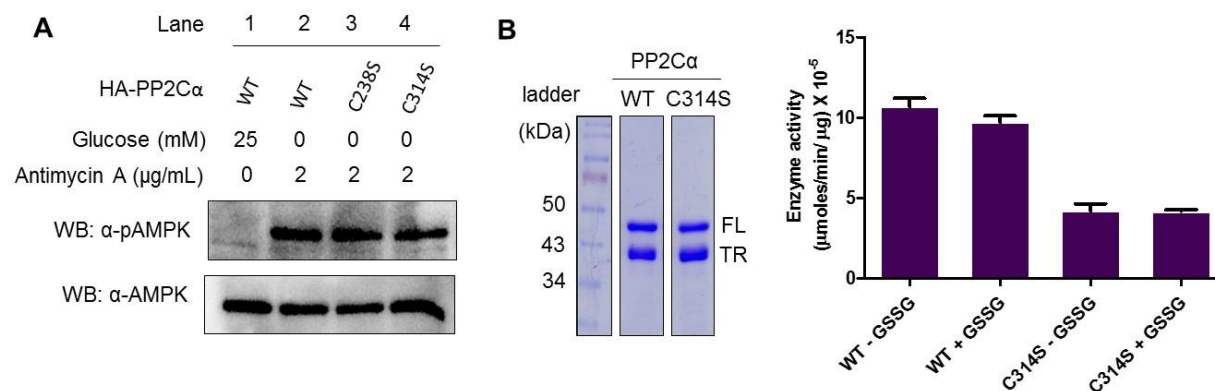

**Figure S8. PP2Cα activity upon glutathionylation.** (A) PP2Cα glutathionylation does not change the level of AMPK phosphorylation. After inducing glutathionylation, cell lysates were probed for AMPK (bottom) and its phosphorylation (top) (B) (Left panel) A gel after purification of His-PP2Cα, which gave a full-length (FL) and a truncated form (TR) that appears to be lack of about 10 kD size of the C-terminus domain. His-tag is on the N-terminus. (Right panel) PP2Cα dephosphorylation assay with p-nitrophenyl phosphate (pNPP): PP2Cα (50 ng/μL) and pNPP (20 mM) were incubated with and without oxidized glutathione (GSSG) (0.5 mM) for 30 min at 37°C, and absorbance was measured at 405 nm.

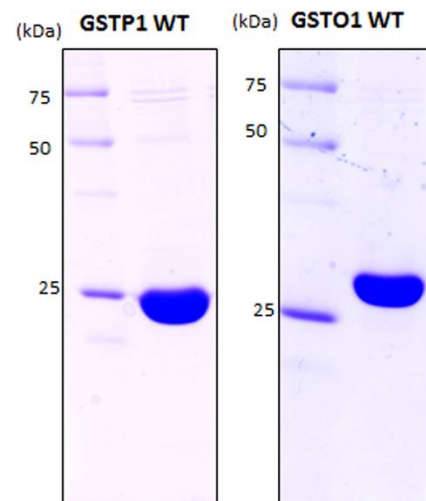

**Figure S9. Purity of GSTP1 and GSTO1 after purification.**

**Table S1. A list of glutathionylated proteins identified in mass analysis that have high spectral counts and high enrichment in the positive over negative sample.**

<sup>a</sup>Neg and Pos = spectral count of the negative and positive samples, respectively.

<sup>b</sup>Loc = Localization (C: cytosol, N: nucleus, EC: extracellular, L: lysosome, M: mitochondrion)

<sup>c</sup>Function = molecular function determined by DAVID GO analysis

<sup>d</sup>Process = biological processes determined by DAVID GO analysis

<sup>e</sup>G = glutathionylation proteomic result by exogenous H<sub>2</sub>O<sub>2</sub><sup>1</sup>

<sup>f</sup>S = sulfenylation proteomic result by exogenous H<sub>2</sub>O<sub>2</sub><sup>2</sup>

| Gene    | Protein                                                                           | Neg <sup>a</sup> | Pos <sup>a</sup> | Loc <sup>b</sup> | Function <sup>c</sup>  | Process <sup>d</sup> | G <sup>e</sup> | S <sup>f</sup> |
|---------|-----------------------------------------------------------------------------------|------------------|------------------|------------------|------------------------|----------------------|----------------|----------------|
| ACE     | Angiotensin-converting enzyme                                                     | 0.0              | 79.8             | EC               | Peptidase              | Cell proliferation   | +              | -              |
| TBA1A   | Tubulin alpha-1A chain                                                            | 0.0              | 59.5             | C                | GTPase                 | Cell division        | +              | -              |
| CTPS1   | CTP synthase 1                                                                    | 0.0              | 43.5             | C                | ligase                 | B cell proliferation | -              | +              |
| RRM1    | Ribonucleoside-diphosphate reductase large subunit                                | 0.0              | 35.0             | C                | ATP binding            | Cell proliferation   | -              | +              |
| GMPS    | GMP synthase                                                                      | 0.0              | 30.5             | C                | Ligase                 | Metabolic            | -              | +              |
| PPP2R1A | Serine/threonine-protein phosphatase 2A 65 kDa regulatory subunit A alpha isoform | 0.0              | 29.0             | C                | Phosphatase regulatory | Apoptosis            | -              | -              |
| NPEPPS  | Puromycin-sensitive aminopeptidase                                                | 0.0              | 28.8             | C, N             | Peptidase              | Stress response      | -              | -              |
| DHX15   | Putative pre-mRNA-splicing factor ATP-dependent RNA helicase                      | 0.0              | 28.3             | N                | Helicase               | mRNA processing      | +              | -              |
| GSPT1   | Eukaryotic peptide chain release factor GTP-binding subunit ERF3A                 | 0.0              | 24.8             | C                | GTPase                 | Cell cycle           | -              | +              |
| PARP1   | Poly [ADP-ribose] polymerase 1                                                    | 0.0              | 23.5             | N                | Glycosyltransferase    | DNA repair           | +              | -              |
| NAA15   | N-alpha-acetyltransferase 15, NatA auxiliary subunit                              | 0.0              | 23.0             | C                | Acetyltransferase      | Angiogenesis         | +              | +              |
| VAR5    | Valine-tRNA synthetase                                                            | 0.0              | 20.0             | C                | Ligase                 | Protein biosynthesis | -              | +              |
| CAND1   | Cullin-associated NEDD8-dissociated protein 1                                     | 0.0              | 19.5             | C, N             | Ubiquitin conjugation  | Proteolysis          | -              | +              |
| CSTB    | Cystatin-B                                                                        | 0.0              | 19.0             | C, N             | Peptidase inhibitor    | proteolysis          | -              | -              |
| USP7    | Ubiquitin carboxyl-terminal hydrolase 7                                           | 0.0              | 18.0             | C, N             | Peptidase              | DNA repair           | -              | -              |
| DIS3    | Exosome complex exonuclease RRP44                                                 | 0.0              | 18.0             | C,N              | Endonuclease           | rRNA processing      | -              | -              |
| TUBA3D  | Tubulin alpha-3C/D chain                                                          | 0.0              | 18.0             | C                | GTPase                 | Protein folding      | -              |                |
| TPP2    | Tripeptidyl-peptidase 2                                                           | 0.0              | 17.5             | C, N             | Peptidase              | Proteolysis          | +              | +              |
| RBBP7   | Histone-binding protein RBBP7                                                     | 0.0              | 16.8             | N                | RNA binding            | DNA replication      | +              | -              |
| HSPA4L  | Heat shock 70 kDa protein 4L                                                      | 0.0              | 16.8             | C, N             | Chaperone              | Stress response      | -              | +              |

|          |                                                                                   |     |      |      |                         |                        |   |   |
|----------|-----------------------------------------------------------------------------------|-----|------|------|-------------------------|------------------------|---|---|
| MAP4     | Microtubule-associated protein 4                                                  | 0.0 | 16.3 | C    | Microtubule binding     | Cell division          | + | + |
| HSPH1    | Heat shock protein 105 kDa                                                        | 0.0 | 15.8 | C    | ATP binding             | Stress response        | - | + |
| TIPRL    | TIP41-like protein                                                                | 0.0 | 14.8 | C    | PP2A inhibitor          | Cell cycle             | + | - |
| HUWE1    | E3 ubiquitin-protein ligase                                                       | 0.0 | 14.8 | C, N | Ligase                  | DNA repair             | - | + |
| PPP2R2A  | Serine/threonine-protein phosphatase 2A 55 kDa regulatory subunit B alpha isoform | 0.0 | 14.5 | C    | Phosphatase             | Cell cycle             | - | + |
| MCMBP    | Mini-chromosome maintenance complex-binding protein                               | 0.0 | 14.3 | N    | Chromatin binding       | Cell cycle             | + | - |
| UBA6     | Ubiquitin-like modifier-activating enzyme 6                                       | 0.0 | 14.3 | C    | ATP binding             | Protein ubiquitination | + | + |
| USP5     | Ubiquitin carboxyl-terminal hydrolase 5                                           | 0.0 | 14.3 | L    | Hydrolase               | Protein catabolism     | - | - |
| SNRNP200 | U5 small nuclear ribonucleoprotein 200 kDa helicase                               | 0.0 | 14.3 | N    | Helicase                | mRNA processing        | - | - |
| GSTM3    | Glutathione S-transferase Mu 3                                                    | 0.0 | 14.0 | C    | Glutathione binding     | Detoxification         | + | - |
| DNM1L    | Dynamin-1-like protein                                                            | 0.0 | 14.0 | C    | Hydrolase               | Apoptosis              | + | - |
| KHSRP    | Far upstream element-binding protein 2                                            | 0.0 | 14.0 | N    | DNA binding             | mRNA processing        | - | - |
| AIMP2    | Aminoacyl tRNA synthase complex-interacting multifunctional protein 2             | 0.0 | 14.0 | C, N | Development -al protein | Apoptosis              | + | + |
| PABPC4   | Polyadenylate-binding protein 4                                                   | 0.0 | 14.0 | C    | mRNA binding            | mRNA processing        | - | + |
| NCAPD2   | Condensin complex subunit 1                                                       | 0.0 | 14.0 | N    | Chromatin binding       | Cell cycle             | - | + |
| MARS     | Methionine--tRNA ligase, cytoplasmic                                              | 0.0 | 13.8 | C    | tRNA ligase             | Gene expression        | - | - |
| UNC45A   | Protein unc-45 homolog A                                                          | 0.0 | 13.8 | C    | Chaperone               | Cell differentiation   | - | - |
| STIP1    | Stress-induced-phosphoprotein 1                                                   | 0.0 | 13.5 | C, N | RNA binding             | Stress response        | + | + |
| CORO1C   | Coronin-1C                                                                        | 0.0 | 12.8 | C    | Actin binding           | cytokinesis            | - | + |
| MSH6     | DNA mismatch repair protein Msh6                                                  | 0.0 | 12.5 | N    | DNA binding             | DNA repair             | + | - |
| IARS     | Isoleucine--tRNA ligase, cytoplasmic                                              | 0.0 | 12.5 | C    | tRNA editing            | Gene expression        | - | - |
| PABPC1   | Polyadenylate-binding protein 1                                                   | 0.0 | 12.0 | C, N | RNA binding             | mRNA processing        | - | + |
| EIF4G1   | Eukaryotic translation initiation factor 4 gamma 1                                | 0.0 | 12.0 | C    | Translation factor      | Translation            | - | + |
| SPAG9    | C-Jun-amino-terminal kinase-interacting protein 4                                 | 0.0 | 11.5 | C    | Kinase binding          | Cell differentiation   | - | - |
| KHDRBS1  | KH domain-containing, RNA-binding, signal transduction-associated protein 1       | 0.0 | 11.5 | N    | DNA binding             | Cell cycle             | - | - |
| PSMD2    | 26S proteasome non-ATPase regulatory subunit 2                                    | 0.0 | 11.3 | C    | MAPKK activator         | Cell proliferation     | + | - |
| ABCE1    | ATP-binding cassette sub-family E member 1                                        | 0.0 | 11.0 | C    | ATPase activity         | RNA catabolism         | - | + |

|        |                                                         |     |       |      |                      |                      |   |   |
|--------|---------------------------------------------------------|-----|-------|------|----------------------|----------------------|---|---|
| GFPT1  | Glucosamine--fructose-6-phosphate aminotransferase 1    | 0.0 | 11.0  | C    | Carbohydrate binding | metabolism           | - | + |
| SND1   | Staphylococcal nuclease domain-containing protein 1     | 0.0 | 11.0  | C, N | Nuclease             | Transcription        | + | - |
| RNPEP  | Aminopeptidase B                                        | 0.0 | 10.8  | EC   | peptidase            | Proteolysis          | - | - |
| SMC4   | Structural maintenance of chromosomes protein 4         | 0.0 | 10.8  | N    | ATP binding          | Cell cycle           | - | - |
| IPO11  | Importin-11                                             | 0.0 | 10.5  | C    | Protein transporter  | Protein transport    | - | - |
| USP9X  | Probable ubiquitin carboxyl-terminal hydrolase FAF-X    | 0.0 | 10.5  | C    | Hydrolase            | Cell cycle           | - | - |
| CRKL   | Crk-like protein                                        | 0.0 | 10.3  | C    | MAPKK activator      | Cell proliferation   | + | + |
| TBCD   | Tubulin-specific chaperone D                            | 0.0 | 10.3  | C    | chaperone            | Protein folding      | + | - |
| PSMD1  | 26S proteasome non-ATPase regulatory subunit 1          | 0.0 | 10.3  | C    | MAPKK activator      | Cell proliferation   | + | - |
| GTF2I  | General transcription factor II-I                       | 0.0 | 10.3  | C, N | DNA binding          | Transcription        | + | + |
| LARP1  | La-related protein 1                                    | 0.0 | 10.3  | C    | mRNA binding         | Cell proliferation   | + | + |
| TTLL12 | Tubulin--tyrosine ligase-like protein 12                | 0.0 | 10.0  | C    | ATP binding          | Tubulin PTM          | - | - |
| EPRS   | Bifunctional glutamate/proline--tRNA ligase             | 1.0 | 68.5  | C    | Ligase               | Translation          | - | + |
| PFAS   | Phosphoribosylformylglycinamidine synthase              | 0.7 | 34.5  | C    | Ligase               | Purine biosynthesis  | - | + |
| NASP   | Nuclear autoantigenic sperm protein                     | 0.7 | 33.0  | C, N | Protein binding      | cell proliferation   | + | + |
| UBE2L3 | Ubiquitin-conjugating enzyme E2 L3                      | 0.7 | 32.8  | C, N | Transferase          | Transcription        | - | - |
| GARS   | Glycine--tRNA ligase                                    | 0.7 | 32.0  | C    | Ligase               | Translation          | - | + |
| PRMT1  | Protein arginine N-methyltransferase 1                  | 0.7 | 25.0  | N    | Methyl transferase   | Gene expression      | - | + |
| FSCN1  | Fascin                                                  | 0.7 | 25.0  | C    | Actin binding        | Cell migration       | + | - |
| HNRNPK | Heterogeneous nuclear ribonucleoprotein K               | 1.0 | 36.8  | C, N | Pre-mRNA binding     | Apoptosis            | - | + |
| XPO1   | Exportin-1                                              | 1.0 | 36.5  | C, N | Protein transporter  | Gene expression      | + | + |
| PPA1   | Inorganic pyrophosphatase                               | 1.0 | 31.0  | C    | Phosphatase          | Gene expression      | - | + |
| PAICS  | Multifunctional protein ADE2                            | 0.7 | 20.3  | C    | Decarboxylase        | Purine biosynthesis  | - | + |
| PREP   | Prolyl endopeptidase                                    | 0.7 | 20.3  | C    | Peptidase            | Proteolysis          | - | + |
| CSE1L  | Exportin-2                                              | 0.7 | 18.0  | C, N | Protein transport    | Apoptosis            | - | + |
| EEF2   | Elongation factor 2                                     | 8.3 | 201.3 | C, N | GTPase               | Translation          | - | + |
| PCMT1  | Protein-L-isoaspartate(D-aspartate) O-methyltransferase | 2.3 | 54.3  | C    | Methyl transferase   | Protein repair       | - | - |
| NPM1   | Nucleophosmin                                           | 1.0 | 23.0  | N    | Chaperone            | Cell proliferation   | - | - |
| PLS3   | Plastin-3                                               | 1.3 | 27.5  | C    | Calcium binding      | Cell differentiation | - | + |

|          |                                                                   |      |       |      |                        |                           |   |   |
|----------|-------------------------------------------------------------------|------|-------|------|------------------------|---------------------------|---|---|
| IMPDH2   | Inosine-5'-monophosphate dehydrogenase 2                          | 0.7  | 13.8  | C, N | Oxidoreductase         | Purine biosynthesis       | - | - |
| CLTC     | Clathrin heavy chain 1                                            | 1.7  | 33.5  | C    | Protein or RNA binding | Protein transport         | - | + |
| PRKDC    | DNA-dependent protein kinase catalytic subunit                    | 2.3  | 46.8  | N    | kinase                 | DNA repair                | + | + |
| YWHAQ    | 14-3-3 protein theta                                              | 0.7  | 13.3  | C    | Protein binding        | Apoptosis                 | - | + |
| ACLY     | ATP-citrate synthase                                              | 2.0  | 39.5  | M    | Transferase            | Lipid metabolism          | + | + |
| EEF1G    | Elongation factor 1-gamma                                         | 3.0  | 58.3  | C    | Transferase            | Gene expression           | - | + |
| RCC2     | Protein RCC2                                                      | 1.3  | 25.3  | N    | GTPase activator       | Cell cycle                | + | + |
| GART     | Trifunctional purine biosynthetic protein adenosine-3             | 5.0  | 78.8  | C    | Ligase                 | Purine biosynthesis       | - | + |
| CPNE1    | Copine-1                                                          | 0.7  | 10.5  | N    | Repressor              | Differentiation           | - | + |
| CCT2     | T-complex protein 1 subunit beta                                  | 4.3  | 66.5  | C    | Chaperone              | Protein folding           | - | + |
| FASN     | Fatty acid synthase                                               | 11.0 | 165.3 | C    | Hydrolase, Transferase | Fatty acid biosynthesis   | - | + |
| AHCY     | Adenosylhomocysteinase                                            | 1.3  | 20.0  | C    | Hydrolase              | One-carbon metabolism     | - | - |
| DYNC1H1  | Cytoplasmic dynein 1 heavy chain 1                                | 1.3  | 19.5  | C    | ATPase                 | Transport                 | - | + |
| PTBP1    | Polypyrimidine tract-binding protein 1                            | 1.7  | 24.0  | N    | Pre-mRNA binding       | mRNA processing           | - | + |
| TARS     | Threonine--tRNA ligase, cytoplasmic                               | 1.0  | 13.3  | C    | Ligase                 | Translation               | - | - |
| HSP90AB1 | Heat shock protein HSP 90-beta                                    | 10.7 | 137.3 | C    | Chaperone              | Stress response           | - | + |
| DDX3X    | ATP-dependent RNA helicase DDX3X                                  | 1.0  | 12.8  | N    | Helicase/ATPase        | Transcription             | + | + |
| TCP1     | T-complex protein 1 subunit alpha                                 | 2.7  | 33.8  | C    | Chaperone              | Protein folding           |   | + |
| IPO5     | Importin-5                                                        | 1.7  | 21.0  | C, N | GTPase inhibitor       | Protein transport         | + | + |
| GSPT2    | Eukaryotic peptide chain release factor GTP-binding subunit ERF3B | 1.0  | 12.5  | C    | GTPase                 | Cell cycle                | - | - |
| CFL1     | Cofilin-1                                                         | 4.7  | 56.8  | N    | Actin binding          | Cytokinesis               | - | + |
| CCT6A    | T-complex protein 1 subunit zeta                                  | 1.0  | 11.0  | C    | Chaperone              | Protein folding           | - | + |
| PRDX2    | Peroxiredoxin-2                                                   | 2.3  | 24.3  | C, M | Peroxidase             | Oxidative stress response | - | - |
| PHGDH    | D-3-phosphoglycerate dehydrogenase                                | 1.3  | 13.8  | C    | Oxidoreductase         | Amino-acid biosynthesis   | - | + |
| GCN1L1   | Translational activator GCN1                                      | 2.3  | 21.5  | C    | RNA binding            | Translation               | - | + |
| PRDX1    | Peroxiredoxin-1                                                   | 2.7  | 24.5  | C, M | Peroxidase             | Oxidative stress response | - | - |
| UBA1     | Ubiquitin-like modifier-activating enzyme 1                       | 6.7  | 57.3  | C,M  | Ligase                 | proteolysis               | + | + |
| PKM      | Pyruvate kinase isozymes M1/M2                                    | 6.3  | 53.5  | C, N | Kinase                 | Glycolysis                | - | + |
| RPL18A   | 60S ribosomal protein L18a                                        | 2.0  | 16.3  | C    | RNA binding            | Translation               | - | - |

|          |                                                    |      |       |       |                            |                           |   |   |
|----------|----------------------------------------------------|------|-------|-------|----------------------------|---------------------------|---|---|
| DDX1     | ATP-dependent RNA helicase                         | 1.3  | 10.8  | N     | Helicase                   | Transcription             | + | - |
| HNRNPF   | Heterogeneous nuclear ribonucleoprotein F          | 1.7  | 11.5  | N     | RNA binding                | mRNA processing           | - | + |
| HSP90AA1 | Heat shock protein HSP 90-alpha                    | 20.7 | 140.5 | C     | Chaperone                  | Stress response           | - | + |
| PRDX6    | Peroxioredoxin-6                                   | 6.0  | 38.0  | C     | peroxidase                 | Oxidative stress response | + | + |
| QARS     | Glutamine--tRNA ligase                             | 1.7  | 10.5  | C, M  | Ligase                     | Translation               | - | + |
| HNRNPL   | Heterogeneous nuclear ribonucleoprotein L          | 5.0  | 25.5  | C, N  | RNA binding                | mRNA processing           | - | + |
| EEF1A2   | Elongation factor 1-alpha 2                        | 12.3 | 60.5  | N     | GTPase                     | Translation               | - | - |
| XRCC6    | X-ray repair cross-complementing protein 6         | 2.7  | 13.0  | N     | Helicase                   | DNA repair                | - | - |
| XRCC5    | X-ray repair cross-complementing protein 5         | 6.3  | 29.5  | N     | Helicase                   | DNA repair                | - | + |
| EIF5AL1  | Eukaryotic translation initiation factor 5A-1-like | 5.7  | 25.8  | C, N  | mRNA binding               | mRNA transport            | - | - |
| EEF1A1   | Elongation factor 1-alpha 1                        | 18.3 | 79.8  | C, N  | GTPase                     | Translation               | - | + |
| CAD      | CAD protein                                        | 2.7  | 11.5  | C, N  | Hydrolase, ligase          | Pyrimidine biosynthesis   | - | - |
| YWHAЕ    | 14-3-3 protein epsilon                             | 4.0  | 14.8  | C     | HDAC binding               | Apoptosis                 | - | + |
| HSPA8    | Heat shock cognate 71 kDa protein                  | 3.0  | 11.0  | C     | ATPase, Chaperone          | Transcription             | - | + |
| ALDOA    | Fructose-bisphosphate aldolase A                   | 3.0  | 10.0  | C     | Lyase                      | Glycolysis                | + | + |
| RPL10    | 60S ribosomal protein L10                          | 4.7  | 14.0  | C     | RNA binding                | Translation               | - | + |
| CCT5     | T-complex protein 1 subunit epsilon                | 6.0  | 16.0  | C     | ATP binding                | Protein folding           | - | + |
| GAPDH    | Glyceraldehyde-3-phosphate dehydrogenase           | 30.7 | 77.3  | C     | Oxidoreductase/transferase | Glycolysis                | - | + |
| MCM3     | DNA replication licensing factor MCM3              | 4.0  | 10.0  | N     | Helicase                   | DNA replication           | + | + |
| NME1     | Nucleoside diphosphate kinase A                    | 7.3  | 18.3  | C, N  | Kinase                     | Cell differentiation      | - | - |
| PGAM1    | Phosphoglycerate mutase 1                          | 8.0  | 17.5  | C     | Isomerase                  | Glycolysis                | + | - |
| PPIA     | Peptidyl-prolyl cis-trans isomerase A              | 7.7  | 15.5  | C, EC | Isomerase                  | Protein folding           | + | - |



### 3. Experimental procedure

#### 3.1 Material

All chemicals were purchased from Sigma unless otherwise stated. 3-Azido-L-alanine HCl (Azido-Ala) was purchased from Jena Biosciences (Germany). EDTA-free protease inhibitor cocktail tablets were purchased from Roche. All cell culture reagents and medium were purchased from Life Technologies. Streptavidin-horseradish peroxidase (HRP) and high capacity streptavidin agarose beads were purchased from Thermo Scientific. HRP-conjugated anti-mouse and anti-rabbit secondary antibodies were purchased from GE healthcare. Light chain specific HRP-conjugated mouse and rabbit secondary antibodies were purchased from Jackson ImmunoResearch and ECM Biosciences, respectively. Polyethyleneimine-MAX was purchased from Polysciences, Inc (USA). Reduced glutathione (Sigma), oxidized glutathione (Acros), 2,2-dithiodipyridine (Acros),  $\gamma$ -glutamyl-cysteine (Sigma), 1-chloro-2,4-dinitrobenzene (CDNB) (Sigma), human glutathione reductase (Sigma), and 2,7-dichlorodihydrofluorescein diacetate (DCF-DA) (Sigma) were purchased. Glutaredoxin 1 (Grx1) was purified as reported previously.<sup>3</sup>

#### 3.2. Synthesis of glutathione derivatives

##### 3.2.1. Synthesis of azido-glutathione (2)

Clickable glutathione containing L-azido-Ala (azido-glutathione,  $N^3$ GSH) was synthesized using GS M4 enzyme, which catalyze L-azido-Ala in place of Gly. 3.5 mM azido-alanine (azido-Ala, 5.9 mg), 3.0 mM  $\gamma$ -glutamyl-cysteine, 10 mM ATP, 50 mM  $MgCl_2$ , 300 mM NaCl, 200 mM Tris buffer (pH 7.4) and GS M4 (80 ng) were mixed in 10 ml final reaction mixture and incubated overnight at 37°C. After acidification (pH 2-3) by adding 1 M HCl, the mixture was centrifuged at 10,000 rpm for 5 min. The supernatant aqueous solution was subjected to reverse-phase C18 column HPLC purification (gradient mobile phase:  $H_2O$  and  $CH_3CN$ ), and the disulfide of azido-glutathione was obtained as a white solid after lyophilization. The purity and mass were confirmed by ESI-MS and LC-MS. Disulfide of azido-glutathione was reduced using dithiothreitol (DTT) (2 equivalent) in 100 mM PBS (pH 7.4) at room temperature for 1 h. The mixture was acidified by addition of 1 M HCl (pH 2-3), and centrifuged at 10,000 rpm for 4 min. The supernatant acidic aqueous layer was subjected to reverse-phase C18 column HPLC purification, and the reduced azido-glutathione was obtained as a white solid after lyophilization, giving azido-glutathione (2) (8 mg, 56%). The purity and mass were confirmed by ESI-MS and LC-MS. Calculated mass: 362.10 Found mass: ESI m/z 363.07 (M+H) 725.18 (2M+H).

### 3.2.2. Synthesis of GS-S-Pyr (3) and <sup>N3</sup>GS-SPyr (4)

Glutathione (GSH, **1**) (10.0 mg, 1 equivalent) or azido-glutathione (<sup>N3</sup>GSH, **2**) (8.0 mg, 1 equivalent) and 2, 2-dithiodipyridine (15.0 mg, 2 equivalent) were mixed in the mixture of water and methanol (1:1 by volume) and stirred for 15-20 h at room temperature. The mixture was concentrated to remove methanol, and the aqueous layer was extracted several times with dichloromethane. The aqueous layer was acidified by addition of 1 M HCl (pH 2-3), and the acidified aqueous portion was then subjected to reverse phase C-18 column HPLC purification, yielding S-(2-thiopyridyl)glutathione (GS-S-Pyr, **3**, 11.1 mg, 82%) or S-(2-thiopyridyl)azido-glutathione (<sup>N3</sup>GS-S-Pyr, **4**, 8.1 mg, 78%) as a white solid after lyophilization. The purity and mass were confirmed by ESI-MS and LC-MS. Calculated mass for S-(2-thiopyridyl)glutathione (**3**): 416.08. Found mass: ESI m/z 417.04 (M+H) and 833.11 (2M+H). Calculated mass for <sup>N3</sup>GS-S-Pyr (**4**): 471.10. Found mass: ESI m/z 472.10 (M+H), 943.21 (2M+H).

### 3.2.3. Synthesis of <sup>N3</sup>GSSG (6)

S-(2-thiopyridyl)azido-glutathione (<sup>N3</sup>GS-S-Pyr, **4**, 7.0 mg, 1 equivalent) and glutathione (GSH, **1**, 4.6 mg, 1 equivalent) were dissolved in 100 mM PBS buffer (pH 7.4), and the reaction mixture was stirred for 2 h at room temperature. The mixture was acidified by addition of 1 M HCl (pH 2-3), and centrifuged at 10,000 rpm for 4 min. The acidic aqueous supernatant was separated by the reverse phase C-18 column HPLC, yielding the mixture disulfide of azido-glutathione with glutathione (<sup>N3</sup>GSSG, **6**, 7.3 mg, 74%). Calculated mass for <sup>N3</sup>GSSG (**6**): 667.17. Found mass: ESI m/z 668.14 (M+H), 334.59 [(M+2H)/2].

### 3.2.4. Synthesis of GSS-Pep (8mer) (7) and <sup>N3</sup>GSS-Pep (8mer) (8)

S-(2-thiopyridyl)glutathione (GS-S-Pyr, **3**, 3.0 mg, 1 equivalent) or S-(2-thiopyridyl)azido-glutathione (<sup>N3</sup>GS-S-Pyr, **4**, 3.0 mg, 1 equivalent) was mixed with 8-mer peptide (Pep: SQLWCLSN), which was synthesized by standard Fmoc solid phase peptide synthesis, in a mixture of PBS buffer (100 mM, pH 7.4) and acetonitrile (4:1 volume). The mixture was stirred for 2 h at room temperature. The aqueous layer was then washed with dichloromethane for five times to remove the thione by-product. The aqueous layer was then acidified by addition of 1 M HCl (pH 2-3). The acidic aqueous portion was subjected to the reverse phase C-18 column HPLC purification, and GSS-Pep (**7**, 6.3 mg, 71%) or <sup>N3</sup>GSS-Pep (**8**, 5.7 mg, 69%) was obtained as white

solids after lyophilization. Calculated mass for GSS-Pep (**7**): 12553.81. Found mass: ESI m/z 1254.80 (M+1). Calculated mass for <sup>N3</sup>GSS-Pep (**8**): 1308.59. Found mass: ESI m/z 1309.86 (M+H), 1331.65 (M+Na).

### **3.3. Purification of GSTO and GSTP**

Human GSTP1 cDNA clone (OriGene) and Human GSTO1 cDNA clone (gift from Dr. Young-Tae Chang, National University of Singapore) were subcloned in to pET-28a(+) bacterial expression vector using NheI/XhoI (GSTP1) and NdeI/XhoI (GSTO1) restriction sites. PCR reaction was performed using forward primer (5'- GCG CGC GCT AGC ATG CCG CCC TAC ACC GTG GTC TAT TTC -3') with NheI and reverse primer (5'- GCG CGC CTCGAG TCA CTG TTT CCC GTT GCC ATT GAT GGG -3') with XhoI for human GSTP1 cDNA clone. Forward primer (5'- GCG CGC CAT ATG ATG TCC GGG GAG TCA GCC AGG-3') with NdeI and reverse primer (5'-GCG CGC CTC GAG TCA GAG CCC ATA GTC ACA GGC C-3') with XhoI were used for the PCR reaction of human GSTO1 cDNA clone. Both PCR product and the empty pET-28a(+) vector were double digested with above restriction enzymes accordingly and ligated using T4 DNA ligase. All cloned plasmids were confirmed by DNA sequencing of entire open reading frames. All the bacterial expression constructs (pET28-His-GSTP1 and pET28-His-GSTO1) were transformed in to BL21 (DE3) cells. Cells were inoculated in 1 L LB medium, and grown at 37°C until OD<sub>600</sub> reached about 0.6. The protein expression (GSTP1 or GSTO1) was induced with 1 mM isopropyl-1-thio-β-D-galactopyranoside (IPTG) and was incubated 4-5 h at 37°C. Cells were harvested by centrifugation at 5000 rpm for 20 min and lysed by passing through French Press (1,000 psi) three times. Cell lysate was then centrifuged at 15,000 rpm for 20 min, and soluble fraction was purified by Ni-NTA affinity column. The eluted proteins were dialyzed by a buffer (50 mM Tris-HCl, pH 8.0, 150 mM NaCl, 0.1 mM DTT and 5% glycerol) and concentrated. Protein concentrations were determined by Bradford assay.

### **3.4. Enzyme assays of GSTP1, GSTO, and GR**

#### **3.4.1. Spectrophotometric assay of GSTP1 activity**

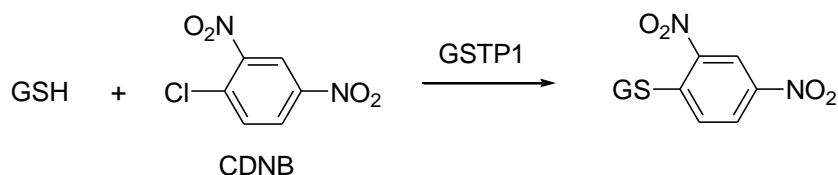

Enzyme assay was carried out in 0.1 M PBS (pH 6.5) with 1 mM EDTA and 1 mM 1-chloro-2,4-dinitrobenzene (CDNB) at 25°C. In this assay, alkylation production (GS-DNB or <sup>N3</sup>GS-DNB) between CDNB and glutathione (1) or azido-glutathione (2) was monitored by measuring absorbance at 340 nm using DU730-Beckman coulter UV-VIS Spectrophotometer. The rate of spontaneous conjugation (non-enzymatic reaction) of GSH or <sup>N3</sup>GSH with CDNB was measured and subtracted from rates of GSTP1-catalyzed reactions. The extinction coefficient (9.6 mM<sup>-1</sup>cm<sup>-1</sup>)<sup>4</sup> for the GS-DNB at 340 nm was used to calculate the enzyme kinetics. Initial velocity versus substrate concentration plots were fitted to the Michaelis-Menten equation using Graphpad prism 5.01 and the kinetic constants (K<sub>m</sub>, k<sub>cat</sub> and V<sub>max</sub>) for glutathione and azido-glutathione were calculated accordingly.

### 3.4.2. Spectrophotometric assay of GR activity

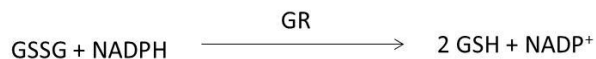

Kinetic parameters for glutathione disulfide reductase (GR) were determined by measuring consumption of NADPH in different substrate concentrations (0.01-0.5 mM). NADPH consumption was monitored at 25°C by UV absorbance at 340 nm. The reaction mixture (0.2 mL) contains 100 mM PBS (pH 7.4), 1 mM EDTA, 0.2 mM NADPH and 50 ng GR. The extinction coefficient (6.2 mM<sup>-1</sup>cm<sup>-1</sup>)<sup>5</sup> for the NADPH was used to calculate the enzyme kinetics. The plot of the initial velocity versus substrate concentrations was fitted to the Michaelis-Menten equation using Graphpad prism 5.01 and kinetic constants (K<sub>m</sub>, k<sub>cat</sub> and V<sub>max</sub>) for GSSG and <sup>N3</sup>GSSG were calculated accordingly.

### 3.4.3. Spectrophotometric assay of Grx1 and GSTO1 activity

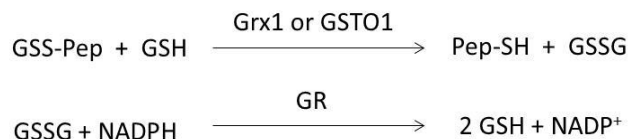

The coupled spectrophotometric assay involving above two reactions was used as reported previously.<sup>3</sup> Excess GR was used so that the second step is not a limiting step. Note that GR catalyzes <sup>N3</sup>GSH with the similar  $k_{\text{cat}}$  and lower  $K_{\text{m}}$  than GSH (Table 1), indicating that <sup>N3</sup>GSSG reduction by GR will not be a limiting step. The assay was performed in 0.1 M PBS (pH 7.4) with 1 mM EDTA, 0.2 mM NADPH, GR (4 units/mL), GSH 0.25 mM, and Grx1 (23 nM) or GSTO1 (0.19  $\mu\text{M}$ ). The mixture was incubated for 7 min at 25°C. The reactions were initiated by addition of the substrate, and the oxidation of NADPH was monitored at 340 nm using DU730-Beckman coulter UV-VIS spectrophotometer. Non-enzymatic reaction at individual substrate concentration was measured and subtracted from the enzyme-catalyzed reaction. The extinction coefficient (6.2  $\text{mM}^{-1}\text{cm}^{-1}$ ) for NADPH was used to calculate the enzyme kinetics. The initial velocity versus substrate concentration was plotted, and fitted to the Michaelis-Menten equation using Graphpad prism 5.01. The kinetic constants ( $K_{\text{m}}$ ,  $k_{\text{cat}}$  and  $V_{\text{max}}$ ) for <sup>N3</sup>GSS-Pep and GSS-Pep were calculated accordingly.

### 3.5. ROS and viability assays

#### 3.5.1. Cell viability assay

HEK 293 cells were grown on a six well plate by adding same number of cells into each well. After 24 h, cells were incubated in DMEM only for 3 h. Cells were then subjected to different conditions for 24 hrs: 1) no treatment (25 mM glucose, 0  $\mu\text{g/mL}$  antimycin A), 2) glucose starvation (0 mM glucose), 3) antimycin A (1  $\mu\text{g/mL}$ ) 4) glucose starvation (0 mM glucose) with antimycin A (1  $\mu\text{g/mL}$  antimycin A), and 5) 0.01% DMSO (amount used to dissolve antimycin A). Antimycin A was dissolved in DMSO. Cells were subjected to trypan blue cell viability assay. Briefly, cells were detached by treating 0.05% trypsin, and diluted with the medium. Then 100  $\mu\text{l}$  of trypan blue reagent was added to the 100  $\mu\text{l}$  of medium with the cells and 20  $\mu\text{l}$  of sample was loaded on to the slide and analyzed the percentage of viable cells by TC 20 automated cell counter (Biorad). The data was shown after duplication of two independent experiments.

### **3.5.2. ROS assays**

HEK293 cells (10,000 cells per well) were seeded and incubated at 37°C, 5% CO<sub>2</sub> for 24 h for attachment on 96-well black plates with transparent flat bottom. Cells were then washed with warm PBS, and incubated in serum-free medium for 3 h. 2,7-dichlorodihydrofluorescein diacetate (DCFH-DA, 25 µM) was then added, and cells were incubated in the same conditions for another 1 h. Cells were then washed with glucose-free medium without phenol red, followed by treatment at the indicated conditions and incubated for 2 h. Untreated cells acted as a negative control. Fluorescence emission scan was measured at 528 nm after excitation at 485 nm. ROS levels were normalized by a negative control (25 mM glucose without antimycin A).

### **3.5.3. The level of thiol concentration**

HEK293/GS M4 cells were treated with 0.5 mM azido-Ala and cells were washed with PBS after 20 h. Cells were then induced for glutathionylation by glucose starvation with antimycin A (2 µg/mL) for 0.5 h or 2 h. After induction, cells were harvested and lysed in PBS by 3 times of freeze-thaw cycles. The cell lysates were collected after centrifugation. Proteins were removed by 3K centrifugal filter device, and the filtrate (FIL) that contains small molecules (including glutathione) was collected. The total and reduced form of thiol contents (glutathione) were analyzed by fluorescence assay using bromobimane (excitation - 390 nm, emission- 478 nm).<sup>6</sup> Bromobimane assay was performed in 0.1 M phosphate buffer, 0.5 mM bromobimane, and 10 µL of protein free lysates (FIL). The fluorescence signal was measured by using a plate reader. To calculate total GSH levels, protein free lysates (FIL) were incubated with 1 mM TCEP at 37°C for 30 minutes before the bromobimane assay. All the data was duplicated and the background signal was corrected.

## **3.6 Cloning, expression, and enzyme assays of PP2C $\alpha$**

### **3.6.1 Cloning and mutagenesis**

Human PP2C $\alpha$  cDNA clone was purchased from OriGene and the gene was subcloned into pcDNA3.1/hygro (+) mammalian vector using BamHI and XhoI restriction sites. PCR reaction was performed using forward primer (5'-GGT GGT GGA TCC GCC ACC ATG GGA GCA TTT TTA GAC AAG C-3') containing Kozak sequence and BamHI restriction site and (5'-GGT GGT CTC GAG CTA AGC GTA ATC TGG AAC ATC GTA TGG GTA CCA CAT ATC ATC TGT TGA TGT AGA G-3') as the reverse primer containing HA tag and XhoI restriction site. Both

PCR product and the empty pcDNA3.1 vector were double digested with above two restriction enzymes and ligated using T4 DNA ligase. All the mutants were generated using pcDNA3.1-PP2C $\alpha$  clone as the template. Quick change mutagenesis was performed using following mutagenic primers. Mutant C204S (forward: 5'-GCC CTT GGG GAT TTT GAT TAC AAA AGT GTC CAT GGA AAA GGT CC-3' and reverse: 5'-GGA CCT TTT CCA TGG ACA CTT TTG TAA TCA AAA TCC CCA AGG GC-3'), C238S (forward: 5'-CAG TTC ATT ATC CTT GCA AGT GAT GGT ATC TGG GAT GTT ATG G-3' and reverse: 5'-CCA TAA CAT CCC AGA TAC CAT CAC TTG CAA GGA TAA TGA ACT G-3') and C314S (forward: 5'-GGA CAA GTA CCT GGA AAG CAG AGT AGA AGA AAT CAT AAA GAA GC 3' and reverse: 5'-GCT TCT TTA TGA TTT CTT CTA CTC TGC TTT CCA GGT ACT TGT CC-3'). pcDNA3.1-PP2C $\alpha$  and empty pET28a vector were double digested using BamHI and XhoI. The digested PP2C $\alpha$  and pET28a were gel-purified and ligation was performed using T4 DNA ligase at 22°C for 1 h. All plasmids were confirmed by DNA sequencing of entire open reading frames.

### **3.6.2. Purification of PP2C $\alpha$**

pET28a-PP2C $\alpha$  was transformed in to BL21(DE3) cells and single colony was inoculated overnight in LB containing 50  $\mu$ g/mL kanamycin. 5 mL overnight culture was diluted in to 1 L LB and grew at 37°C until OD<sub>600</sub> reaches 0.4. Protein overexpression was induced for 4 h at 37°C with 0.5 mM IPTG. Cells were harvested, lysed and purified as described in section 3.3.

### **3.6.3. Enzyme assays of PP2C $\alpha$**

PP2C $\alpha$  enzyme (WT and C314S) activities were calculated by end point assay using *para*-nitrophenyl phosphate (pNPP) as the substrate. Proteins were incubated with or without 0.5 mM GSSG in 20 mM Tris, pH 7.4 for 15 min at 37°C. Phosphatase assay was performed in the colorimetric assay buffer containing 20 mM Tris, pH 7.4, 5 mM MgCl<sub>2</sub>, 1 mM ethylene glycol-bis(2-aminoethylether)-*N,N,N',N'*-tetraacetic acid (EGTA) and 0.1 mg/mL BSA. Different amounts of each protein were mixed with 20 mM pNPP in 100  $\mu$ L final volume and incubated for 30 min at 37°C before quenching the reaction with 50  $\mu$ L of 5 N NaOH. Enzyme activities ( $\mu$ moles/min/ $\mu$ g) were calculated using absorbance measured at 405 nm.

## **References**

1. Chiang, B. Y., Chou, C. C., Hsieh, F. T., Gao, S., Lin, J. C., Lin, S. H., Chen, T. C., Khoo, K. H., Lin, C. H. (2012) In vivo tagging and characterization of S-glutathionylated proteins by a chemoenzymatic method, *Angew. Chem., Int. Ed.* 51, 5871-5875.
2. Yang, J., Gupta, V., Carroll, K. S., Liebler, D. C. (2014) Site-specific mapping and quantification of protein S-sulphenylation in cells, *Nat. Commun.* 5, 4776.
3. Samarasinghe, K. T. G., Munkanatta Godage, D. N. P., VanHecke, G. C., Ahn, Y. H. (2014) Metabolic synthesis of clickable glutathione for chemoselective detection of glutathionylation, *J. Am. Chem. Soc.* 136, 11566-11569.
4. Gronwald, J. W., Plaisance, K. L. (1998) Isolation and characterization of glutathione S-transferase isozymes from sorghum, *Plant physiol.* 117, 877-892.
5. Gallogly, M. M., Starke, D. W., Leonberg, A. K., Ospina, S. M., Mieyal, J. J. (2008) Kinetic and mechanistic characterization and versatile catalytic properties of mammalian glutaredoxin 2: implications for intracellular roles, *Biochemistry* 47, 11144-11157.
6. Anderson, M. T., Trudell, J. R., Voehringer, D. W., Tjioe, I. M., Herzenberg, L. A., Herzenberg, L. A. (1999) An improved monobromobimane assay for glutathione utilizing tris-(2-carboxyethyl)phosphine as the reductant, *Anal. Biochem.* 272, 107-109.
